# Supplementary material for: Aromatic, Sensory, and Fatty Acid Profiles of Arbequina Extra Virgin Olive Oils Produced Using Different Malaxation Conditions
Source: MDPI journal article supplement (doi:10.3390/foods11213446), 2022-10-30
Supplement: s1 [file s1]

## Supplementary materials

**Table S1.** Volatile compounds C6 and C5 divided into chemical classes and according to their formation from linoleic (LA) and linolenic (LnA) acids.

| Fatty acid                | Concentration (mg/kg) <sup>1</sup> |                           |                            |                           |                           |                           |
|---------------------------|------------------------------------|---------------------------|----------------------------|---------------------------|---------------------------|---------------------------|
|                           | 20 °C                              |                           | 25 °C                      |                           | 30 °C                     |                           |
|                           | 30 min                             | 45 min                    | 30 min                     | 45 min                    | 30 min                    | 45 min                    |
| ΣC6 LnA-Ald. <sup>2</sup> | 11.73 ± 1.93 <sup>a</sup>          | 20.51 ± 5.72 <sup>b</sup> | 11.69 ± 0.46 <sup>a</sup>  | 20.76 ± 3.21 <sup>b</sup> | 18.90 ± 3.25 <sup>b</sup> | 11.21 ± 0.31 <sup>a</sup> |
| ΣC6 LnA-Alc. <sup>3</sup> | 1.38 ± 0.19 <sup>c</sup>           | 0.94 ± 0.48 <sup>bc</sup> | 1.01 ± 0.03 <sup>bc</sup>  | 0.40 ± 0.05 <sup>a</sup>  | 0.59 ± 0.41 <sup>ab</sup> | 1.04 ± 0.04 <sup>bc</sup> |
| ΣC6 LA-Ald. <sup>4</sup>  | 0.76 ± 0.08 <sup>c</sup>           | 1.00 ± 0.05 <sup>d</sup>  | 0.68 ± 0.03 <sup>bc</sup>  | 0.45 ± 0.12 <sup>a</sup>  | 0.46 ± 0.17 <sup>a</sup>  | 0.56 ± 0.02 <sup>ab</sup> |
| ΣC6 LnA-Est. <sup>5</sup> | 0.53 ± 0.10 <sup>c</sup>           | 0.22 ± 0.05 <sup>ab</sup> | 0.57 ± 0.03 <sup>c</sup>   | 0.30 ± 0.05 <sup>b</sup>  | 0.26 ± 0.04 <sup>ab</sup> | 0.19 ± 0.01 <sup>a</sup>  |
| ΣC6 LA-Est. <sup>6</sup>  | 0.08 ± 0.02 <sup>b</sup>           | 0.07 ± 0.03 <sup>ab</sup> | 0.14 ± 0.01 <sup>c</sup>   | 0.10 ± 0.01 <sup>bc</sup> | 0.08 ± 0.04 <sup>b</sup>  | 0.04 ± 0.00 <sup>a</sup>  |
| ΣC5 LnA-Alc. <sup>7</sup> | 0.49 ± 0.11 <sup>a</sup>           | 0.46 ± 0.04 <sup>ab</sup> | 0.54 ± 0.03 <sup>ab</sup>  | 0.58 ± 0.17 <sup>a</sup>  | 0.68 ± 0.06 <sup>b</sup>  | 0.59 ± 0.01 <sup>ab</sup> |
| ΣC5 LnA-Ket. <sup>8</sup> | 0.46 ± 0.12 <sup>ab</sup>          | 0.42 ± 0.03 <sup>a</sup>  | 0.58 ± 0.04 <sup>abc</sup> | 0.50 ± 0.12 <sup>ab</sup> | 0.70 ± 0.16 <sup>c</sup>  | 0.62 ± 0.04 <sup>bc</sup> |
| ΣC5 LnA-Ald. <sup>9</sup> | 0.13 ± 0.02 <sup>ab</sup>          | 0.11 ± 0.01 <sup>ab</sup> | 0.11 ± 0.01 <sup>a</sup>   | 0.18 ± 0.08 <sup>b</sup>  | 0.14 ± 0.04 <sup>ab</sup> | 0.13 ± 0.02 <sup>ab</sup> |
| Σpen. Dim. <sup>10</sup>  | 2.26 ± 0.40 <sup>a</sup>           | 2.07 ± 0.11 <sup>b</sup>  | 1.88 ± 0.09 <sup>a</sup>   | 2.11 ± 0.16 <sup>b</sup>  | 1.88 ± 0.40 <sup>b</sup>  | 1.55 ± 0.10 <sup>a</sup>  |

<sup>1</sup> Results are given as “mean ± standard deviation”. Values with the same superscript letters in the same row do not differ significantly between the samples for  $p < 0.05$ . <sup>2</sup> Sum of (*E*)-2-hexenal and (*Z*)-2-hexenal; <sup>3</sup> Sum of (*E*)-3-hexen-1-ol and (*E*)-2-hexen-1-ol; <sup>4</sup> Hexanal; <sup>5</sup> (*Z*)-3-hexen-1-ol-acetate; <sup>6</sup> Hexyl acetate; <sup>7</sup> Sum of 1-penten-3-ol and 2-penten-1-ol; <sup>8</sup> 1-penten-3-one; <sup>9</sup> Pentanal; <sup>10</sup> 3-ethyl-1,5-octadiene (1-6).
